# Supplementary material for: Preparation of ellipsoid-shaped supraparticles with modular compositions and investigation of shape-dependent cell-uptake
Source: Royal Society of Chemistry journal article supplement (doi:10.1039/c6ra19861a), 2016-01-01
Supplement: c6ra19861a1.pdf [file c6ra19861a1.pdf]

## Supplementary Information

### **Preparation of Ellipsoid-Shaped Supraparticles with Modular Compositions and Investigation of Shape-Dependent Cell-Uptake**

*Sebastian Ulrich, Cordula Hirsch, Liliane Diener, Peter Wick, René M. Rossi, Markus B. Bannwarth,,\* Luciano F. Boesel\**

## Hydrophobic Nanoparticles

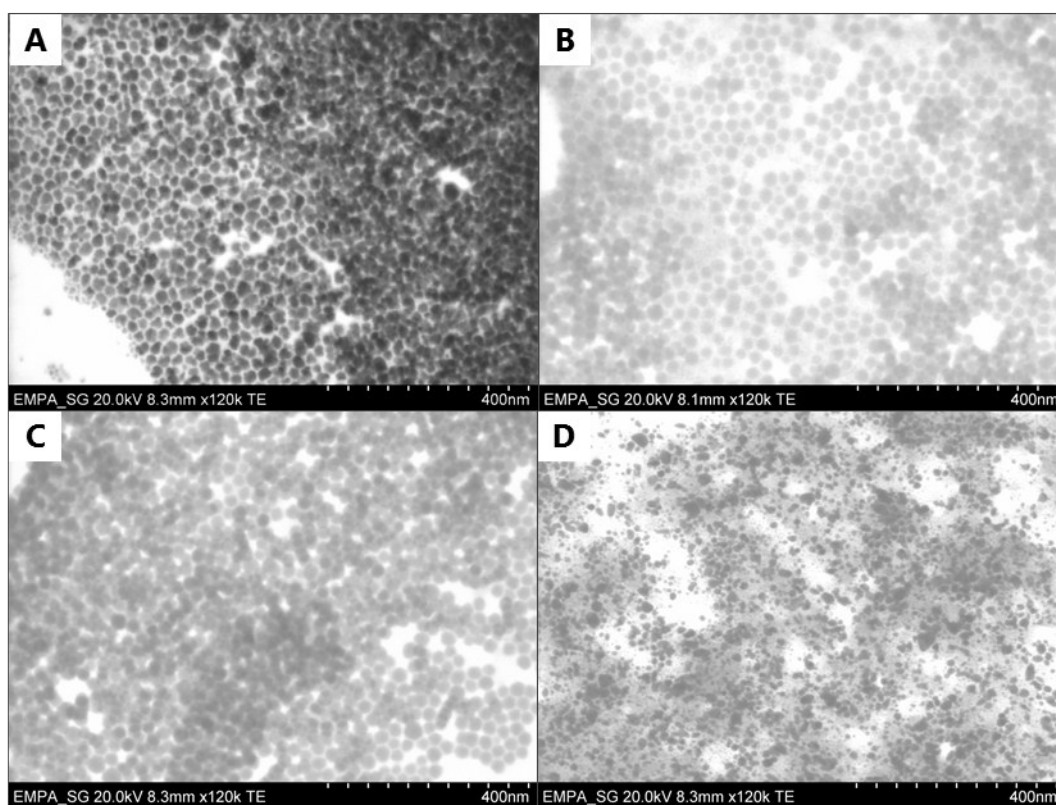

**Figure S1.** STEM images of the different types of hydrophobic nanoparticles. (A) Magnetite nanoparticles Fe<sub>3</sub>O<sub>4</sub>NP; (B) anatase nanoparticles TiO<sub>2</sub>NP; (C) silica nanoparticles SiO<sub>2</sub>NP; (D) silver nanoparticles AgNP.

## Absorption and Transmittance Spectra of TiO<sub>2</sub>NP and AgNP

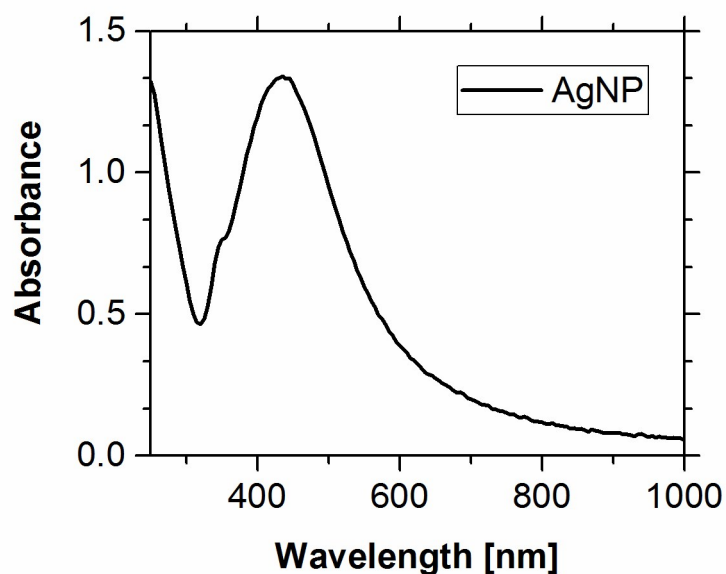

**Figure S2.** Absorbance of hydrophobic silver nanoparticles AgNP dispersed in chloroform.

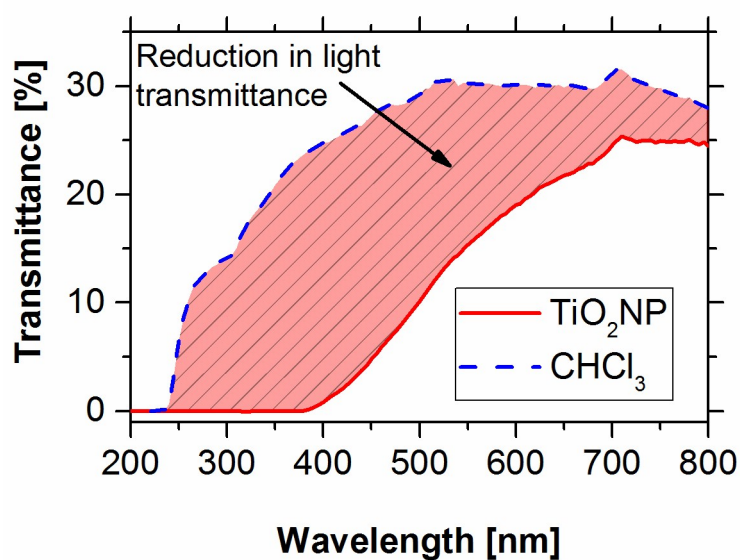

**Figure S3.** Transmittance spectrum of hydrophobic anatase nanoparticles TiO<sub>2</sub>NP measured in chloroform. The area inbetween the two curves for pure chloroform and the nanoparticles dispersion indicated the reduction in light transmission by TiO<sub>2</sub>NP.

**Parameter: PVA Concentration**

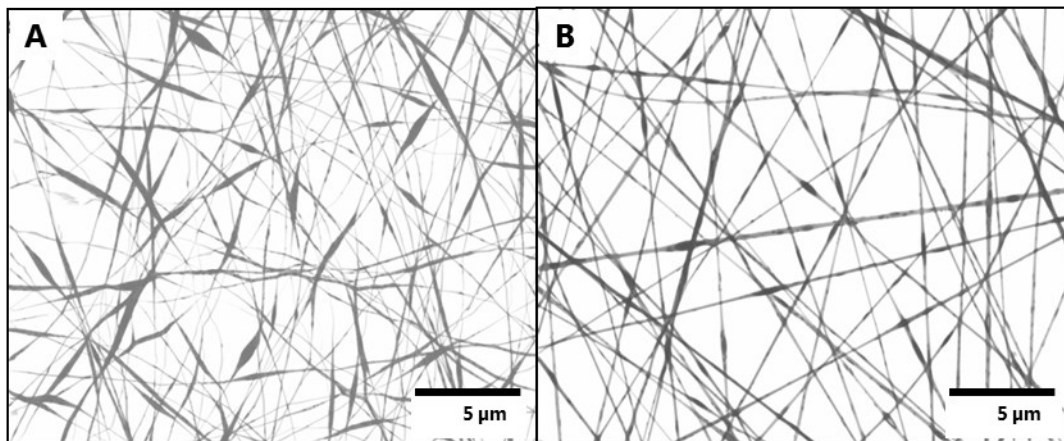

**Figure S4.** Influence of PVA concentration on electrospun fibers. Both STEM images show Fibers containing ESP of Fe<sub>3</sub>O<sub>4</sub> that were electrospun at (A) 9 wt.% PVA or (B) 10 wt.% PVA.

**Parameter: Solvent Type**

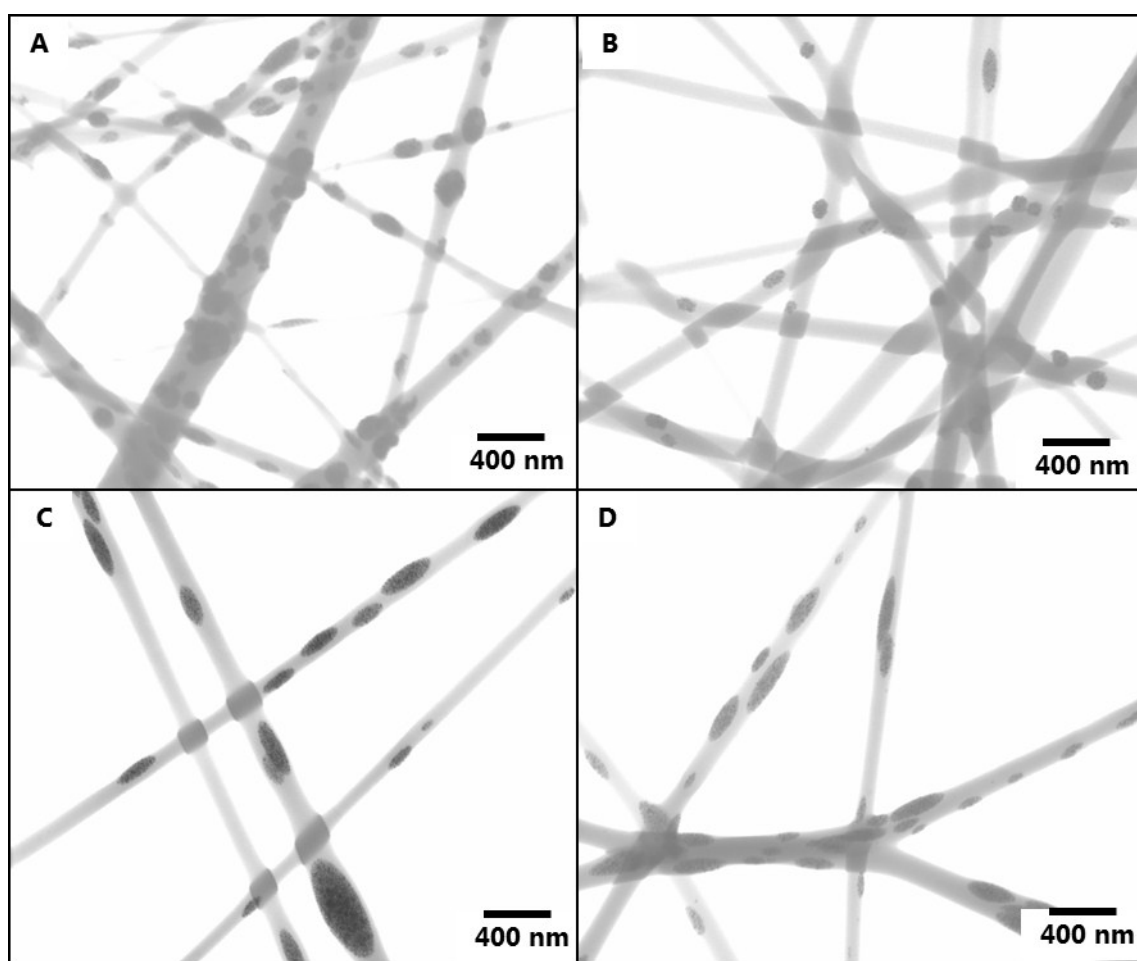

**Figure S5.** Influence of solvent on the formation of ESPs of  $\text{Fe}_3\text{O}_4$ . (A-D) The STEM images show electrospun fibers containing ESPs from droplets of (A) pure toluene, (B) pure chloroform, (C) pure n-octane, and (D) a mixture of toluene with n-octane 2:1.

**Parameter: Relative Humidity**

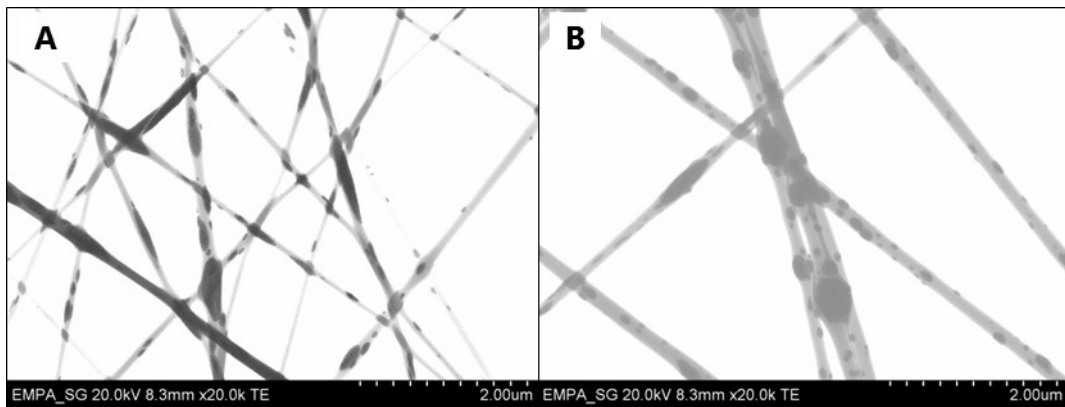

**Figure S6.** STEM images of PVA fibers containing ESPs of  $\text{Fe}_3\text{O}_4$  that were electrospun at (A) 60% relative humidity or (B) 30% relative humidity.

**Parameter: Voltage**

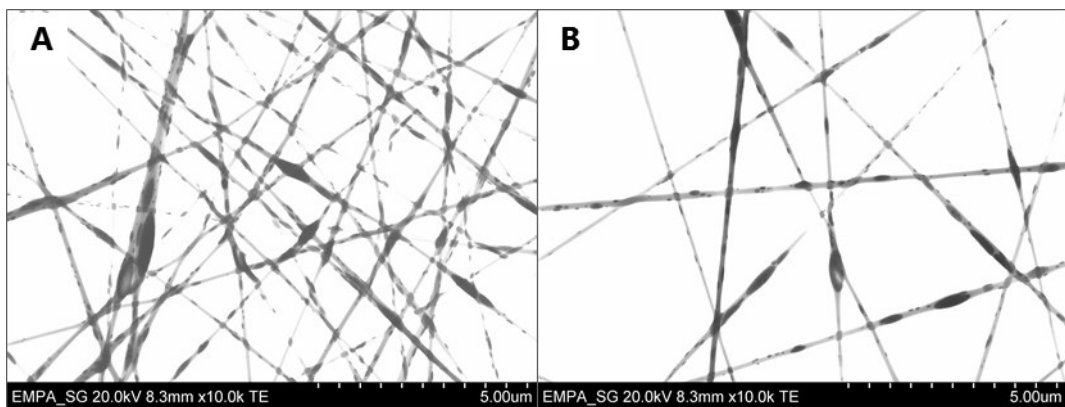

**Figure S7.** STEM images of PVA fibers containing ESPs of  $\text{Fe}_3\text{O}_4$  that were electrospun at (A) 14 kV or (B) 8 kV anodal voltage.

**Parameter: Distance**

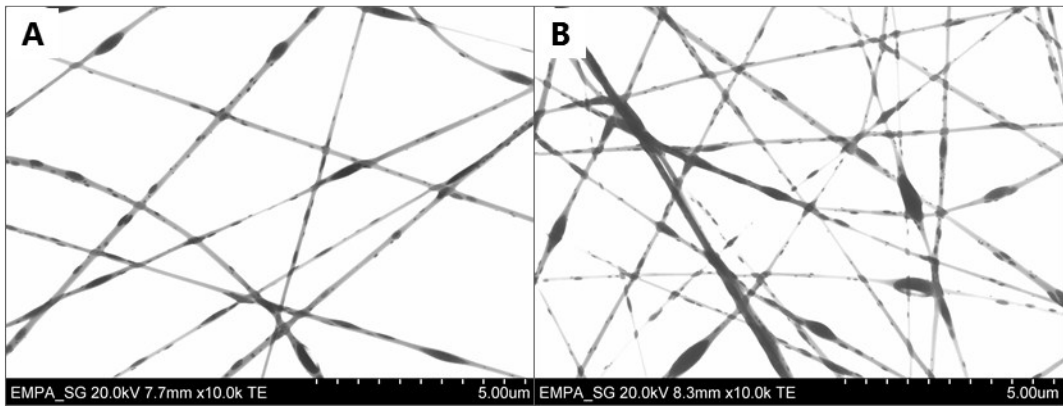

**Figure S8.** STEM images of PVA fibers containing ESPs of Fe<sub>3</sub>O<sub>4</sub> that were electrospun from a needle tip to collector distance of (A) 25 cm or (B) 10 cm.

## Dispersibility of TiO<sub>2</sub>NP

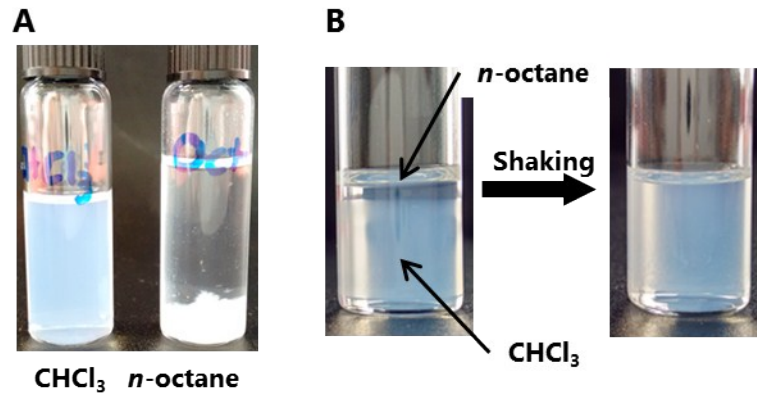

**Figure S9.** Dispersibility of TiO<sub>2</sub>NP in organic solvents. (A) Dispersibility in chloroform vs. *n*-octane (equal amount of nanoparticles). (B) Mixing of *n*-octane into a TiO<sub>2</sub>NP chloroform dispersion resulting in a clear dispersion for ESP fabrication.



## ESP of TiO<sub>2</sub>

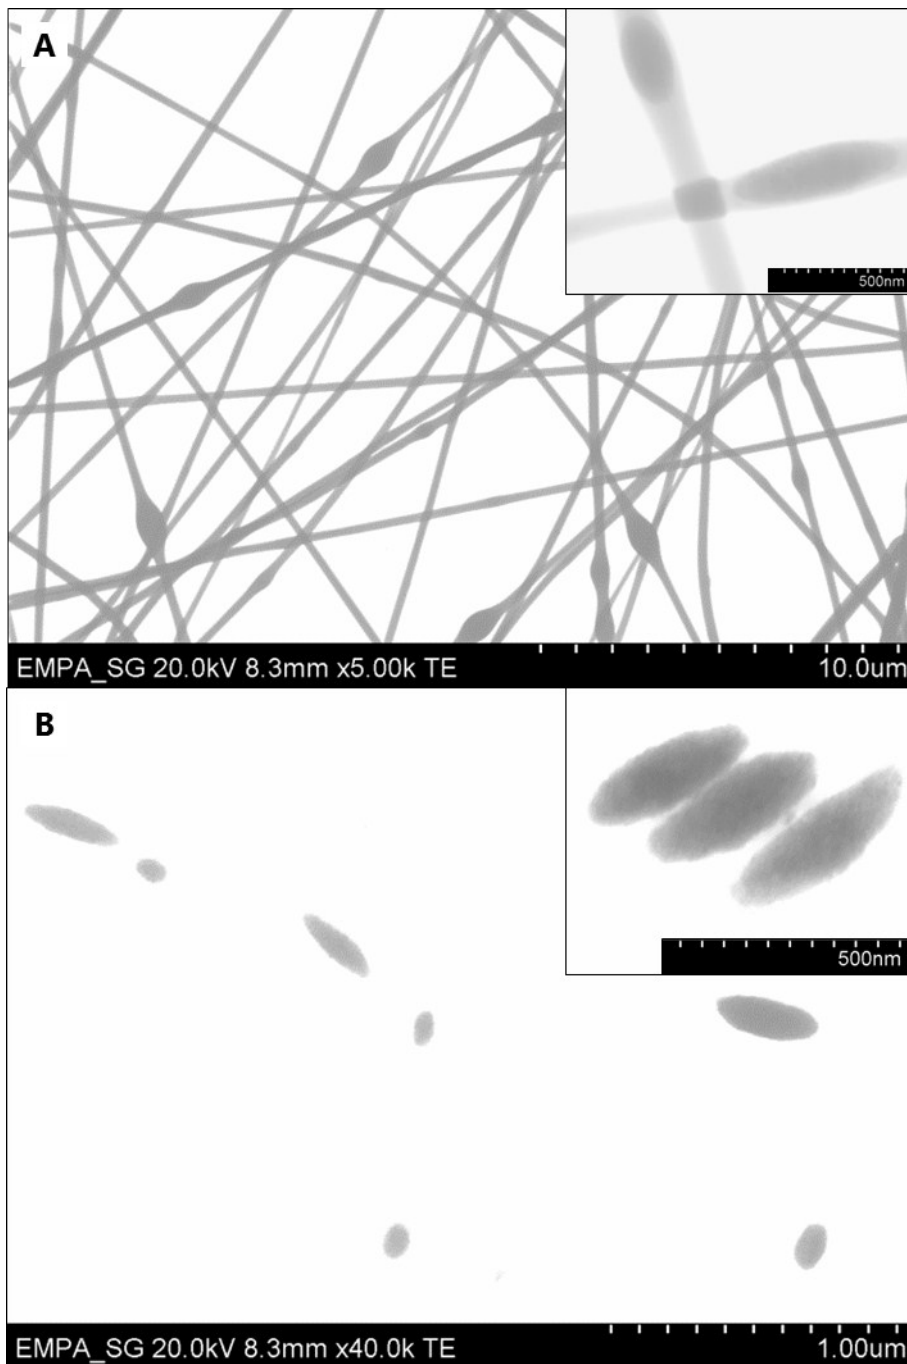

**Figure S10.** Fabrication of ESP of TiO<sub>2</sub>. (A) STEM image of electrospun PVA fibers containing ESP of TiO<sub>2</sub>. (B) STEM image of ESPs of TiO<sub>2</sub> from dispersion after dissolution of the PVA fibers.

## Thermogravimetric Analysis of Nanoparticles

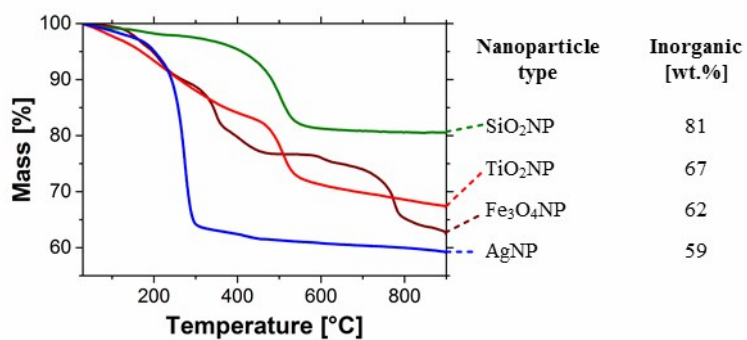

**Figure S11.** Thermogravimetric Analysis of the used nanoparticles. The inorganic content was determined as the remaining mass after the highest temperature was reached.

## Calcination of HESPs

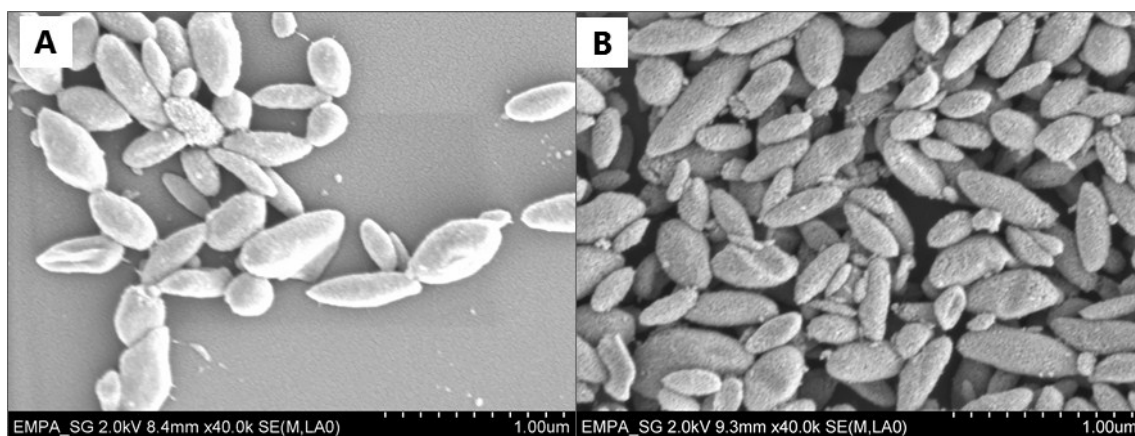

**Figure S12.** SEM images of HESP of Fe<sub>3</sub>O<sub>4</sub>/TiO<sub>2</sub> (A) without calcination from direct drop-casting from aqueous dispersion on a silicon wafer or (B) after calcination for 6 h at 600 °C.

## Magnetic Orientation

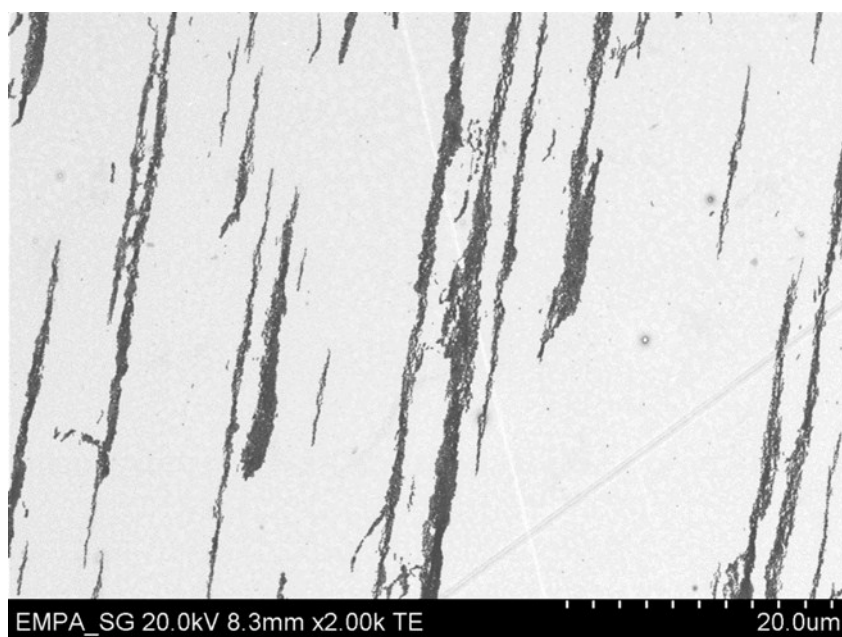

**Figure S13.** STEM image of ESPs of Fe<sub>3</sub>O<sub>4</sub> that were drop-cast from aqueous dispersion on a TEM copper grid and dried in 4 cm distance to a strong NdFeB permanent magnet (40 x 40 x 20 mm). The water was left to evaporate at room temperature.

**Analysis of Cell Viability (MTS Assay):** To assess cell viability  $1.5 \times 10^4$  A549 cells per well were seeded in 200  $\mu\text{L}$  complete cell culture medium in a 96-well cell culture plate and grown overnight under standard growth conditions. Thereafter cells were treated for 24 h with 200  $\mu\text{L}$  standard growth medium per well containing increasing concentrations of the supraparticles or the positive control agent  $\text{CdSO}_4$ . CellTiter 96® AQueous One Solution (Promega) containing MTS (3-(4,5-dimethylthiazol-2-yl)-5-(3-carboxymethoxy phenyl)-2-(4-sulfophenyl)-2H) as the water-soluble tetrazolium compound was used according to the manufacturer's protocol.

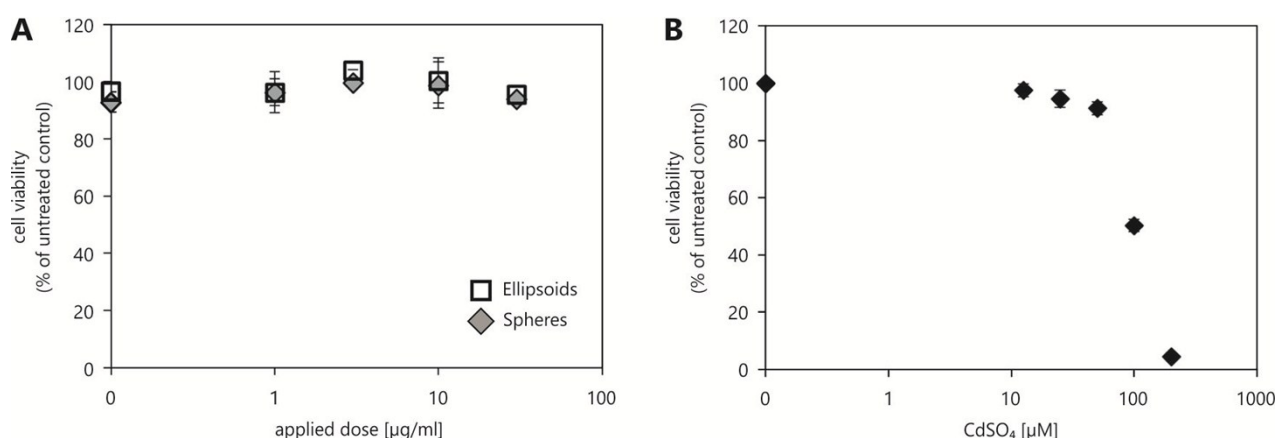

**Figure S14.** Cell viability analysis using the MTS assay. (A) Both supraparticle types do not influence cell viability at concentrations up to 30  $\mu\text{g}/\text{mL}$  and over an incubation period of 24 h. (B) In contrast the assay internal positive control ( $\text{CdSO}_4$ ) reduces cell viability in a dose-dependent manner.

**Flow cytometry analysis of supraparticle uptake:** Untreated A549 cells served as the negative control sample. Gates were adjusted to place 97-99% of all cells in the lower right quadrant (+-). Cells in this area exhibit average granularity values. An increase in cell granularity, due to uptake of nanoparticles, results in an increase in side-scatter (SS) values. Consequently such cells appear in the upper right quadrant (++) of the dotplot. The number of cells appearing in the upper right quadrant can thus be quantified as a measure of particle uptake efficacy.

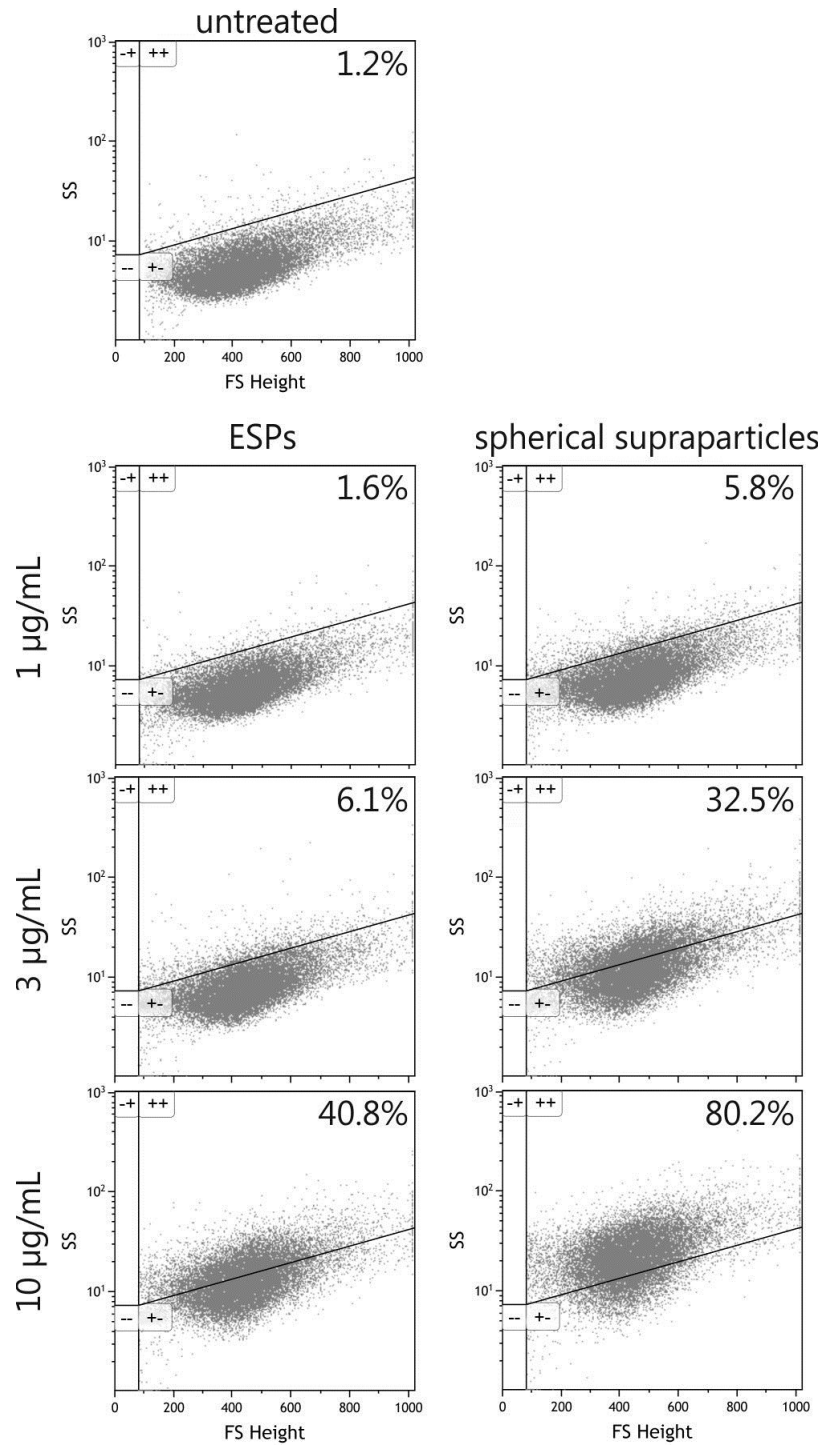

**Figure S15.** Representative example of flow cytometry results. A549 cells were treated with increasing concentrations of the respective supraparticles for 24 h and cell numbers in the upper right quadrant (++) were quantified as a measure of particle uptake. Cell numbers are given in % of total cell count. 20000 cells per sample were analyzed.

**Quantification of total iron content in treated A549 cells by ICP-OES:** For ICP-OES measurements A549 cells were treated for 24 h with 10  $\mu\text{g/mL}$  of ESPs or spherical supraparticles of  $\text{Fe}_3\text{O}_4$  or remained untreated. Cells were harvested with Trypsin/EDTA and pelleted by centrifugation (200g, 5 min). Cell pellets were resuspended in complete cell culture medium and counted using a Neubauer counting chamber. Equal amounts of cells for each sample were pelleted again (200g, 5 min), resuspended in 0.1 mL nitric acid (65%; p.A.), transferred into a Teflon pressure vessel and treated with micro waves at 500 W for 5 min (MLS, 1200 mega, Leutkirch, Germany). The resulting solution was diluted with ddH<sub>2</sub>O to a final volume of 5 mL and analyzed for iron content by atomic emission spectrometry (ICP-OES Optima 300 from Perkin Elmer, Schwerzenbach, Switzerland) with external calibration. Total iron content in each sample was finally normalized to applied cell number.

**Table S1.** Iron content in A549 cells.

| <b>treatment</b>         | <b>total iron content [<math>\mu\text{g}</math>]</b> | <b>cell number [<math>\times 10^6</math>]</b> | <b>normalized iron content [<math>\mu\text{g}/10^6</math> cells]</b> |
|--------------------------|------------------------------------------------------|-----------------------------------------------|----------------------------------------------------------------------|
| untreated                | 0.087                                                | 1.2                                           | 0.07                                                                 |
| ESPs                     | 6.37                                                 | 1.2                                           | 5.31                                                                 |
| spherical supraparticles | 15.5                                                 | 1.4                                           | 11.1                                                                 |
